# Supplementary material for: Highly efficient electrocatalysts with CoO/CoFe2O4 composites embedded within N-doped porous carbon materials prepared by hard-template method for oxygen reduction reaction
Source: Royal Society of Chemistry journal article supplement (doi:10.1039/c7ra09517a), 2017-01-01
Supplement: c7ra09517a1.pdf [file c7ra09517a1.pdf]

## Highly Efficient Electrocatalysts with CoO/CoFe<sub>2</sub>O<sub>4</sub> Composites embedded within N-doped Porous Carbon Materials Prepared by Hard-template Method for Oxygen Reduction Reaction

Xinxin Jin,<sup>a</sup> Yu Jiang,<sup>ab</sup> Qi Hu,<sup>a</sup> Shaohua Zhang,<sup>a</sup> Qike Jiang,<sup>a</sup> Li Chen,<sup>c</sup> Ling Xu,<sup>b</sup> Yan Xie,<sup>a\*</sup> and Jiahui Huang,<sup>a\*</sup>

**Table S1.** The surface area and mean pore size distribution of FeCo/NPC pyrolyzed at various temperature of 600 to 1000 °C.

| Electrocatalysts | S <sub>BET</sub> | D <sub>ave</sub> (nm) |
|------------------|------------------|-----------------------|
| FeCo/NPC (600)   | 861              | 4.0                   |
| FeCo/NPC (700)   | 894              | 4.2                   |
| FeCo/NPC (800)   | 761              | 4.3                   |
| FeCo/NPC (900)   | 958              | 3.2                   |
| FeCo/NPC (1000)  | 990              | 5.8                   |

**Table S2.** The E<sub>1/2</sub> comparison of NNMEs with different transition metal salts (Fe or/and Co), metal-free NNME and commercial Pt/C measured in 0.1 M KOH solution.

| Electrocatalysts             | Co    | FeCo <sub>3</sub> | FeCo  | Fe <sub>3</sub> Co | Fe    | metal free | Pt/C  |
|------------------------------|-------|-------------------|-------|--------------------|-------|------------|-------|
| E <sub>1/2</sub> (V vs. RHE) | 0.728 | 0.831             | 0.865 | 0.833              | 0.791 | 0.745      | 0.844 |

**Table S3.** The surface area and mean pore size distribution of NNMEs: NNME-No MgO (900), NNME-No Adipic acid (900) and FeCo/NPC (900).

| Electrocatalysts          | S <sub>BET</sub> (m <sup>2</sup> g <sup>-1</sup> ) | S <sub>mic</sub> (m <sup>2</sup> g <sup>-1</sup> ) | V <sub>t</sub> (cm <sup>3</sup> g <sup>-1</sup> ) | D <sub>ave</sub> (nm) |
|---------------------------|----------------------------------------------------|----------------------------------------------------|---------------------------------------------------|-----------------------|
| NNME-No MgO (900)         | 417                                                | 166                                                | 0.4                                               | 4.2                   |
| NNME-No Adipic acid (900) | 833                                                | 598                                                | 0.5                                               | 2.8                   |
| FeCo/NPC (900)            | 958                                                | 720                                                | 0.7                                               | 3.2                   |

**Table S4.** The  $E_{1/2}$  comparison of NNMEs compared with reported data in 0.1 M KOH solution.

| Electrocatalyst                         | Cat. loading (mg cm <sup>-2</sup> ) | $E_{onset}$ (V vs. RHE) | $E_{1/2}$ (V vs. RHE) | Reference                                                             |
|-----------------------------------------|-------------------------------------|-------------------------|-----------------------|-----------------------------------------------------------------------|
| CNT/HPC-1000                            | 0.6                                 | 0.92                    | 0.82                  | <i>Angew. Chem. Int. Ed.</i> <b>2014</b> , 53, 4102-4106 <sup>1</sup> |
| Carbon-L                                | 0.1                                 | 0.86                    | 0.70                  | <i>Energy Environ. Sci.</i> <b>2014</b> , 7, 442-450 <sup>2</sup>     |
| Fe-N/C-800                              | 0.1                                 | 0.92                    | 0.81                  | <i>J. Am. Chem. Soc.</i> <b>2014</b> , 136, 11027-11033 <sup>3</sup>  |
| PANI-4.5Fe-HT2 (SBA-15)                 | 0.61                                | 0.95                    | 0.84                  | <i>J. Mater. Chem. A</i> <b>2014</b> , 2, 8617-8622 <sup>4</sup>      |
| Fe-N-GC-900 (2:1)                       | 0.2                                 | 1.01                    | 0.86                  | <i>ACS Catal.</i> <b>2014</b> , 4, 1793-1800 <sup>5</sup>             |
| Fe <sub>3</sub> C/NG-800                | 0.4                                 | 1.03                    | 0.86                  | <i>Adv. Mater.</i> <b>2015</b> , 27, 2521-2527 <sup>6</sup>           |
| Co@Co <sub>3</sub> O <sub>4</sub> @C-CM | 0.1                                 | 0.93                    | 0.81                  | <i>Energy Environ. Sci.</i> <b>2015</b> , 8, 568-576 <sup>7</sup>     |
| N/Co-doped PCP//NRGO                    | 0.714                               | 0.97                    | 0.86                  | <i>Adv. Funct. Mater.</i> <b>2015</b> , 25, 872-882 <sup>8</sup>      |
| N-Carbon nanotube frameworks            | 0.2                                 | 0.97                    | 0.87                  | <i>Nat. Energy</i> <b>2016</b> , 1, 15006 <sup>9</sup>                |
| Core/shell NPME                         | 0.6                                 | 0.936                   | 0.87                  | <i>Adv. Funct. Mater.</i> <b>2017</b> , 1604356 <sup>10</sup>         |
| FeCo/NPC (900)                          | 0.6                                 | 0.934                   | 0.865                 | This work                                                             |

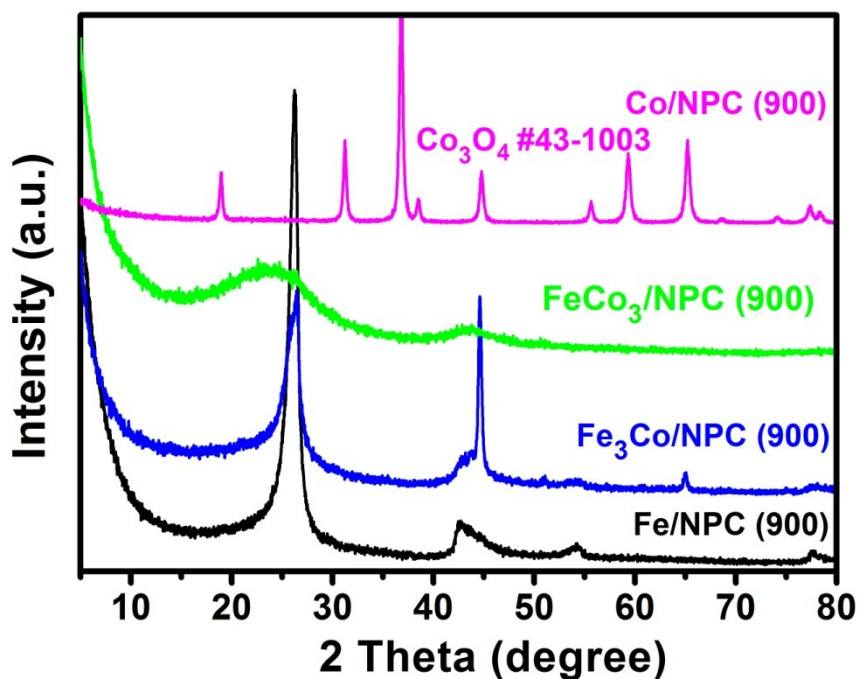

**Fig. S1.** The XRD patterns of NNMEs prepared with different ratio of Fe and Co, including only Fe, Fe<sub>3</sub>Co, FeCo<sub>3</sub> and only Co.

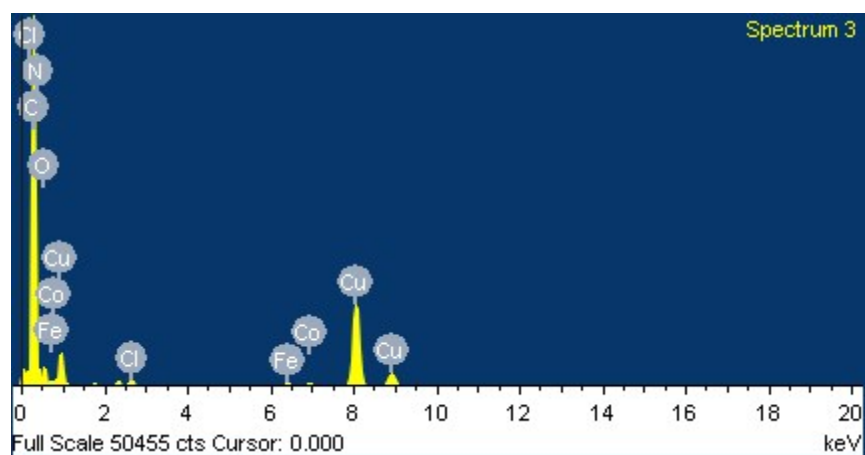

(a)

| Element | Weight% | Atomic% |
|---------|---------|---------|
| C K     | 70.84   | 88.33   |
| N K     | 3.47    | 3.71    |
| O K     | 2.55    | 2.38    |
| Cl K    | 0.58    | 0.25    |
| Fe K    | 0.30    | 0.08    |
| Co K    | 0.53    | 0.14    |
| Cu K    | 21.73   | 5.12    |
| Totals  | 100.00  |         |

(b)

**Fig. S2.** The EDX (a) and the according element content (b) of FeCo/NPC (900).

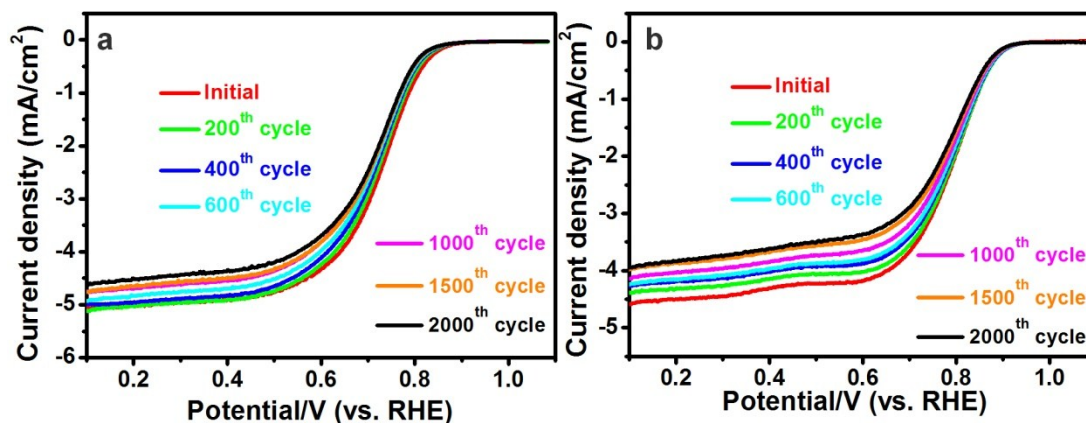

Fig. S3. ORR polarization curves of (a) Co/NPC (900) and (b) Fe/NPC (900) at 1600 rpm with a scan rate of  $5 \text{ mV s}^{-1}$  in  $\text{O}_2$ -saturated  $0.1 \text{ M KOH}$  solution.

### Reference

1. Y. J. Sa, C. Y. Park, H. Y. Jeong, S. H. Park, Z. H. Lee, K. T. Kim, G. G. Park and S. H. Joo, *Angew. Chem. Int. Ed.*, 2014, **53**, 4102-4106.
2. P. Zhang, F. Sun, Z. H. Xiang, Z. G. Shen, J. Yun and D. P. Cao, *Energy Environ. Sci.*, 2014, **7**, 442-450.
3. L. Lin, Q. Zhu and A. W. Xu, *J. Am. Chem. Soc.*, 2014, **136**, 11027-11033.
4. X. H. Yan and B. Q. Xu, *J. Mater. Chem. A*, 2014, **2**, 8617-8622.
5. A. G. Kong, X. F. Zhu, Z. Han, Y. Y. Yu, Y. B. Zhang, B. Dong and Y. K. Shan, *ACS Catal.*, 2014, **4**, 1793-1800.
6. M. L. Xiao, J. B. Zhu, L. G. Feng, C. P. Liu and W. Xing, *Adv. Mater.*, 2015, **27**, 2521-2527.
7. W. Xia, R. Q. Zou, L. An, D. G. Xia and S. J. Guo, *Energ. Environ. Sci.*, 2015, **8**, 568-576.
8. Y. Hou, Z. H. Wen, S. M. Cui, S. Q. Ci, S. Mao and J. H. Chen, *Adv. Funct. Mater.*, 2015, **25**, 872-882.
9. B. Y. Xia, Y. Yan, N. Li, H. B. Wu, X. W. Lou and X. Wang, *Nat. Energy*, 2016, **1**, 15006.
10. J. Li, Y. J. Song, G. X. Zhang, H. Y. Liu, Y. R. Wang, S. H. Sun and X. W. Guo, *Adv. Funct. Mater.*, 2017, **27**, 1604356.
